RESEARCH ARTICLE

# Alcohol enhances type 1 interferon- $\alpha$ production and mortality in young mice infected with *Mycobacterium tuberculosis*

Deepak Tripathi<sup>1</sup>\*, Elwyn Welch<sup>1</sup>\*, Satyanarayana Swamy Cheekatla<sup>1</sup>\*, Rajesh Kumar Radhakrishnan<sup>1</sup>\*, Sambasivan Venkatasubramanian<sup>1</sup>, Padmaja Paidipally<sup>1</sup>, Abhinav Van<sup>1</sup>, Buka Samten<sup>1</sup>, Kamakshi P. Devalraju<sup>2</sup>, Venkata Sanjeev Kumar Neela<sup>2</sup>, Vijaya Lakshmi Valluri<sup>2</sup>, Carol Mason<sup>3</sup>, Steve Nelson<sup>3</sup>, Ramakrishna Vankayalapati<sup>1</sup>\*

**1** Department of Pulmonary Immunology, Center for Biomedical Research, University of Texas Health Science Center at Tyler, Tyler, Texas, United States of America, **2** Bhagwan Mahavir Medical Research Center, Hyderabad, India, **3** Department of Medicine, Section of Pulmonary/Critical Care Medicine, Louisiana State University Health Sciences Center, New Orleans, Louisiana, United States of America

\* These authors contributed equally to this work.

\* Current address: Department of Biotechnology, Gandhi Institute of Technology and Management (GITAM) Institute of Science, GITAM University, Visakhapatnam, Andhra Pradesh, India.

\* [krishna.vankayalapati@uthct.edu](mailto:krishna.vankayalapati@uthct.edu)

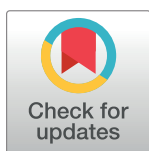

**OPEN ACCESS**

**Citation:** Tripathi D, Welch E, Cheekatla SS, Radhakrishnan RK, Venkatasubramanian S, Paidipally P, et al. (2018) Alcohol enhances type 1 interferon- $\alpha$  production and mortality in young mice infected with *Mycobacterium tuberculosis*. PLoS Pathog 14(8): e1007174. <https://doi.org/10.1371/journal.ppat.1007174>

**Editor:** David M. Lewinsohn, Portland VA Medical Center, Oregon Health and Science University, UNITED STATES

**Received:** March 20, 2018

**Accepted:** June 24, 2018

**Published:** August 2, 2018

**Copyright:** © 2018 Tripathi et al. This is an open access article distributed under the terms of the [Creative Commons Attribution License](https://creativecommons.org/licenses/by/4.0/), which permits unrestricted use, distribution, and reproduction in any medium, provided the original author and source are credited.

**Data Availability Statement:** All relevant data are within the paper.

**Funding:** This work was supported by grants from the National Institutes of Health (A1054629, A1073612 and A1085135 to RV), CRDF global, The Cain Foundation for Infectious Disease Research and The Department of Pulmonary Immunology. The funders had no role in study design, data

## Abstract

In the current study, we used a mouse model and human blood samples to determine the effects of chronic alcohol consumption on immune responses during *Mycobacterium tuberculosis* (*Mtb*) infection. Alcohol increased the mortality of young mice but not old mice with *Mtb* infection. CD11b+Ly6G+ cells are the major source of IFN- $\alpha$  in the lungs of *Mtb*-infected alcohol-fed young mice, and IFN- $\alpha$  enhances macrophage necroptosis in the lungs. Treatment with an anti-IFNAR-1 antibody enhanced the survival of *Mtb*-infected alcohol-fed young mice. In response to *Mtb*, peripheral blood mononuclear cells (PBMCs) from alcoholic young healthy individuals with latent tuberculosis infection (LTBI) produced significantly higher amounts of IFN- $\alpha$  than those from non-alcoholic young healthy LTBI+ individuals and alcoholic and non-alcoholic old healthy LTBI+ individuals. Our study demonstrates that alcohol enhances IFN- $\alpha$  production by CD11b+Ly6G+ cells in the lungs of young *Mtb*-infected mice, which leads to macrophage necroptosis and increased mortality. Our findings also suggest that young alcoholic LTBI+ individuals have a higher risk of developing active TB infection.

## Author summary

Chronic alcohol consumption modulates the host immune defense mechanism(s) and makes the host susceptible to various fungal, viral and bacterial infections, including *Mycobacterium tuberculosis* (*Mtb*). However, limited information is available about the mechanisms involved in alcohol-mediated host susceptibility to *Mtb* and other intracellular bacterial infections. In the current study, we fed control and alcohol diets to young and old mice and determined the mortality rates and the immune mechanisms involved in

collection and analysis, decision to publish, or preparation of the manuscript.

**Competing interests:** The authors declare no competing financial interests.

host susceptibility to *Mtb* infection. We found that alcohol increases the mortality of young mice but not old mice infected with *Mtb*. The increased mortality in alcohol-fed *Mtb*-infected young mice was due to IFN- $\alpha$  production by CD11b+Ly6G+ cells. We also found that PBMCs from young alcoholic individuals with latent tuberculosis infection (LTBI) produced significantly higher amounts of IFN- $\alpha$  than those from young non-alcoholic, old alcoholic and old non-alcoholic LTBI+ individuals. Our findings suggest that young alcoholic LTBI+ individuals have a higher risk of developing active TB infection. Our studies provide the first evidence that chronic alcohol consumption induces IFN- $\alpha$  production in young *Mtb*-infected mice and increases their mortality rates. Further characterization of CD11b+Ly6G+ cells and delineation of the mechanisms through which alcohol enhances IFN- $\alpha$  production in Ly6G+ cells during *Mtb* infection will facilitate the development of therapies for alcoholic individuals with latent and active *Mtb*.

## Introduction

It is estimated that more than two billion people worldwide are infected with *Mycobacterium tuberculosis* (*Mtb*), but only 5–10% of these individuals develop TB during their lifetime [1,2]. The geriatric population represents a large reservoir of latent tuberculosis infection (LTBI) [3]. It is difficult to diagnose and treat tuberculosis in aged individuals [3,4]. Approximately 57% of tuberculosis deaths occur in the aged population (above 50), and this burden is high in developed countries [5]. Immunosuppressive conditions, such as HIV infection, diabetes mellitus and drug and alcohol abuse, are risk factors that increase the chances of tuberculosis (TB) reactivation in people with LTBI [6–9]. In addition, individuals with alcoholism show higher relapse rates and a higher probability of having multidrug-resistant TB [10].

Alcoholism leads to the development of liver cirrhosis, cancer, insulin resistance, epilepsy, hypertension, psoriasis, preterm birth complications, cardiovascular diseases and stroke [11,12]. Chronic alcohol consumption impairs the host immune response to cancer and infections [13]. Alcohol impairs monocyte phagocytic and antigen-presenting capacities and suppresses the alveolar macrophage production of monokines, such as IL-23, in response to infection [14–16]. Alcohol-exposed dendritic cells produce more IL-10 and less IL-12, suggesting an inhibitory effect on dendritic cell function [17,18]. In humans and experimental mice, chronic alcohol consumption makes neutrophils hypo-responsive to bacterial infections [19]. Prolonged alcohol consumption induces type I interferon (IFN) and tumor necrosis factor alpha (TNF alpha) production [20]. Alcohol impairs NK cell trafficking and inhibits NK cell cytotoxicity [21]. Chronic alcohol consumption impairs adaptive immune responses mediated by B and T-cells [22]. These immunosuppressive effects of alcohol are more severe in elderly individuals than in young individuals [23].

Chronic alcohol consumption makes the host susceptible to various bacterial infections, including TB [24]. Epidemiological and immunological evidence strongly suggest a link between alcoholism and the worsening of TB disease [25]. Chronic alcohol consumption impairs the immune responses of *Mtb*-infected mice [19]. Alcohol feeding before BCG vaccination reduces T cell responses, but there are no effects when BCG vaccination is delivered prior to alcohol feeding [26]. These studies were performed after the short term-feeding of mice with alcohol, and the mechanism(s) involved in host susceptibility remain unknown. The long-term effects of alcohol consumption on host defense mechanisms against *Mtb* infection are also unknown, particularly in old individuals.

In this study, we determined the survival of alcohol-fed young and old mice infected with *Mtb*. We also determined the immune mechanisms responsible for the early death of alcohol diet-fed young mice infected with *Mtb*.

## Results

### Young alcoholic mice are susceptible to *Mtb* infection

Young and old mice were fed alcohol or control diets for one month and then infected with *Mtb* H37Rv as detailed in the methods section. Alcohol or control diet feeding was continued until the death of the mice or the termination of the experiment. As shown in Fig 1, eighty per cent of *Mtb*-infected alcohol-fed young mice died within 6 months ( $p < 0.01$ , Fig 1A); there was a twenty-five percent death rate in *Mtb*-infected alcohol-fed old mice, a twenty-five percent death rate in *Mtb*-infected control diet-fed old mice and no deaths in the control diet-fed young mice. In these groups of mice, most of the deaths occurred after three months. The bacterial burden in the lungs of these mice was measured three months after *Mtb* infection. As shown in Fig 1B, there was a marginal increase in the bacterial burden in *Mtb*-infected control diet-fed old mice compared to that in the other groups, and there was a marginal but significant decrease in the bacterial burden in the lungs of alcohol-fed old mice. The above results demonstrate that there is no correlation between the bacterial burden and increased mortality in alcoholic mice infected with *Mtb*. Serum alcohol levels and liver alanine transaminase activity were similar among all groups of mice (Figs 1A, 1B and S1).

### Alcohol enhances IFN- $\alpha$ production in young mice infected with *Mtb*

We determined whether alcohol had any effect on the pro- and anti-inflammatory responses of young mice following *Mtb* infection. Young mice were fed control and alcohol diets and infected with *Mtb* as in Fig 1. After three months, the levels of various cytokines and chemokines were measured in the lung homogenates by multiplex (23-plex) ELISA. As shown in Fig 2A, at three months p.i., various cytokines and chemokines were measured, but only IFN- $\alpha$  levels were increased significantly in *Mtb*-infected alcohol-fed young mice compared to those

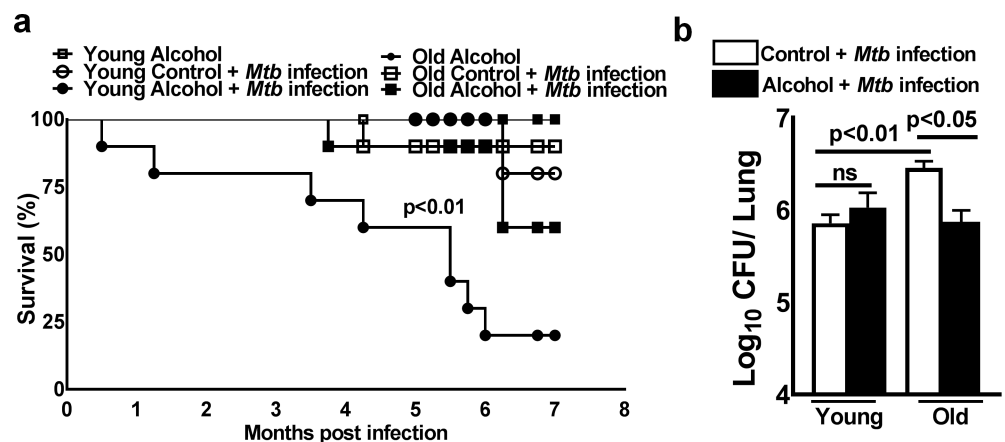

**Fig 1. Young alcoholic mice are susceptible to *Mtb* infection.** Young (one to two months of age) and old (17 to 22 months of age) mice were fed control and alcohol diets for one month as detailed in the methods section; then, they were infected with 50–100 CFU of aerosolized *Mtb* H37Rv, and control and alcohol diet feeding was continued. **a.** Survival was determined. Survival curves were compared using the log-rank test ( $P < 0.05$ ). **b.** Bacterial burden in lungs at 3 months p.i. The data are representative of two pooled independent experiments (5 mice per group were used for each independent experiment). The mean values, p-values and SEs are shown.

<https://doi.org/10.1371/journal.ppat.1007174.g001>

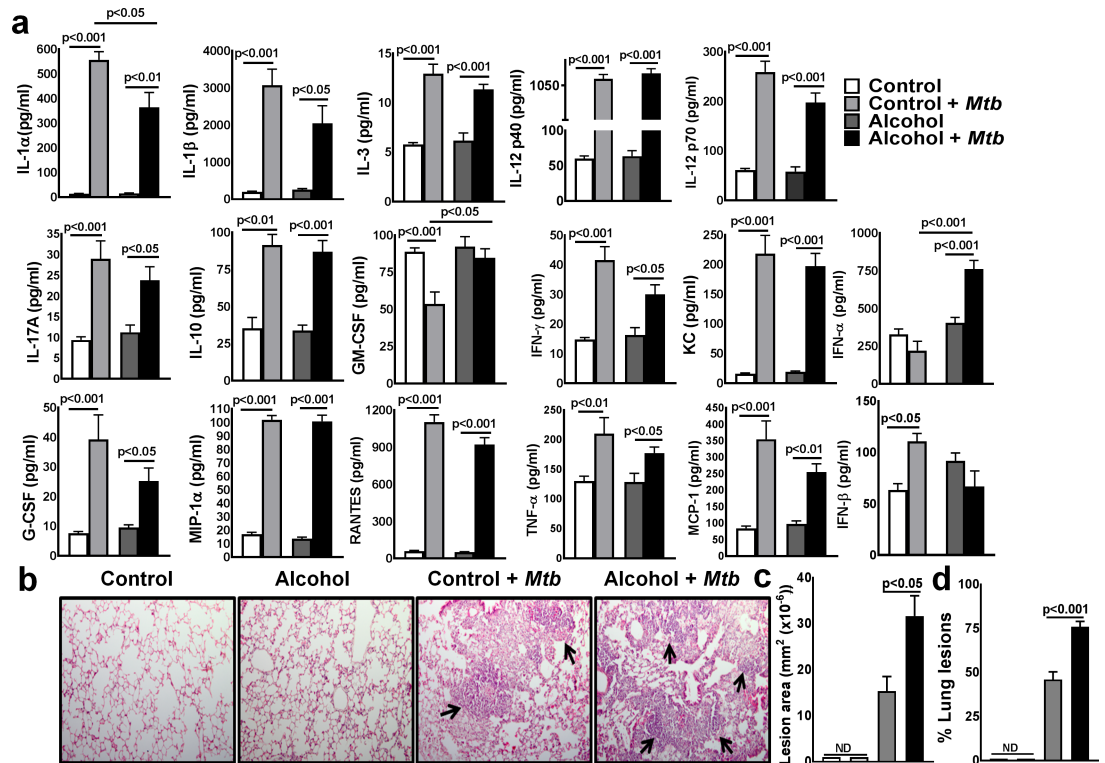

**Fig 2. Alcohol enhances IFN- $\alpha$  production in young mice infected with *Mtb*.** Young mice were fed control and alcohol diets as detailed in the methods section; then, they were infected with 50–100 CFU of aerosolized *Mtb* H37Rv, and control and alcohol diet feeding was continued. **a.** At three months p.i., lung homogenates from uninfected control and alcohol diet-fed and *Mtb*-infected control and alcohol diet-fed mice were collected, and cytokine and chemokine levels were determined by multiplex ELISA. **b-d.** At three months p.i., lungs from uninfected control and alcohol diet-fed mice as well as from *Mtb*-infected control and *Mtb*-infected alcohol diet-fed mice were isolated and formalin fixed. Paraffin-embedded tissue sections were prepared, and hematoxylin and eosin staining was performed. Inflamed lung areas were compared between the groups. **b.** A representative figure is shown. **c.** The lesion area and **d.** % lung lesions were calculated. The data are representative of two independent experiments. Five mice per group were used for each independent experiment. The mean values, p-values and SEs are shown.

<https://doi.org/10.1371/journal.ppat.1007174.g002>

in uninfected alcohol-fed and *Mtb*-infected control diet-fed mice (Fig 2A). There was a marginal but significant decrease in IL-1 $\alpha$  levels in *Mtb*-infected alcohol-fed young mice compared to those in *Mtb*-infected control diet-fed mice (Fig 2A).

Histological analyses indicated that the number of lesions throughout the lungs was significantly higher in *Mtb*-infected alcohol diet-fed young mice than in *Mtb*-infected young control mice and uninfected young mice (Fig 2B, 2C and 2D).

### CD11b+Ly6G+ cells are the major source of IFN- $\alpha$ in *Mtb*-infected young alcoholic mice

To determine the cellular source of IFN- $\alpha$  in *Mtb*-infected alcohol diet-fed young mice, we first quantified the leukocyte populations by flow cytometry. As shown in Fig 3 and S2A and S2B Fig, at three months after *Mtb* infection, the number of CD11b+Ly6G+ cells in the lungs was significantly higher in *Mtb*-infected alcohol diet-fed young mice than in *Mtb*-infected control mice and uninfected alcohol diet-fed mice. We next determined the phenotype of IFN- $\alpha$ -producing pulmonary cells three months p.i.; there were no significant differences in the absolute numbers of IFN- $\alpha$ -producing CD11c+ and F4/80 cells (Fig 4A and 4B). However, the absolute number of IFN- $\alpha$ -producing CD11b+Ly6G+ cells in the lungs was significantly



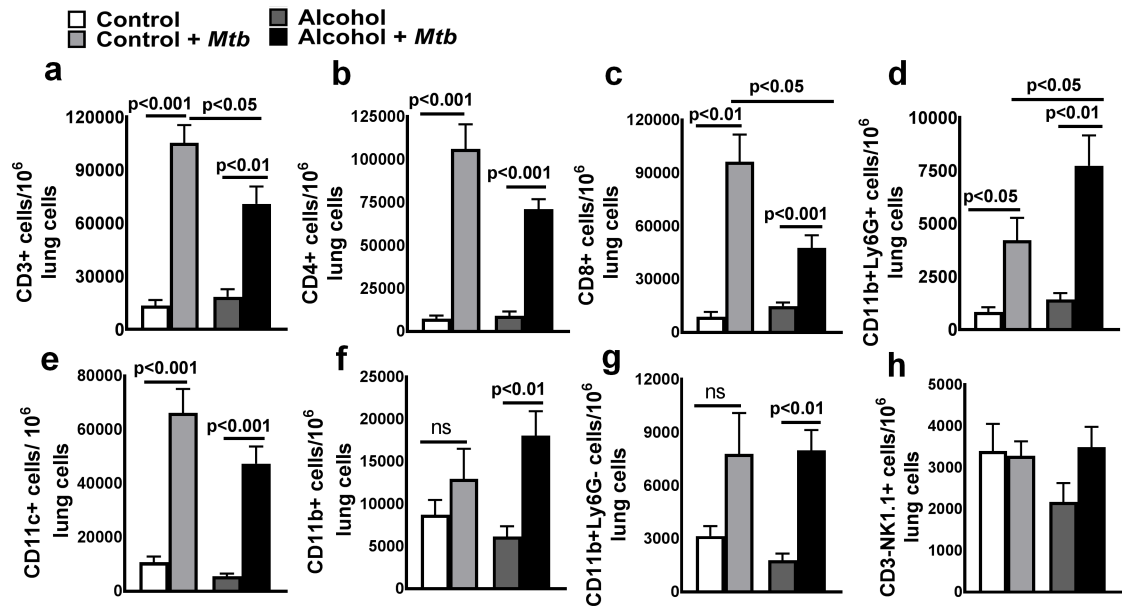

**Fig 3. Absolute number of lung leukocyte populations in *Mtb*-infected alcohol and control diet-fed mice.** Young control and alcohol diet-fed mice were infected with 50–100 CFU of aerosolized *Mtb*. At three months p.i., lungs from uninfected control and alcohol diet-fed mice and from *Mtb*-infected control and alcohol diet-fed mice were isolated. The absolute numbers of various leukocyte populations, namely, a. CD3+ b. CD4+ c. CD8+ d. CD11b+Ly6G+ e. CD11c+ f. CD11b+ g. CD11b+Ly6G- and h. CD3-NK1.1+ cells, per 10<sup>6</sup> total lung cells were determined by flow cytometry. The data are representative of two independent experiments. Five mice per group were used for each independent experiment. The mean values, p-values and SEs are shown.

<https://doi.org/10.1371/journal.ppat.1007174.g003>

higher in *Mtb*-infected young alcoholic mice than in uninfected alcohol diet-fed mice and *Mtb*-infected control mice (Fig 4C and 4D). To confirm our findings that IFN- $\alpha$  levels were increased in the lungs of *Mtb*-infected young alcohol diet-fed mice, mice were euthanized three months p.i., and lung sections were examined for IFN- $\alpha$ + cells by immunofluorescence staining. As shown in Fig 4F, the mean immunofluorescence intensity for IFN- $\alpha$  was significantly higher in *Mtb*-infected alcohol diet-fed young mice than in *Mtb*-infected control and uninfected alcoholic mice. We also found that Ly6G+ cells are the major source of IFN- $\alpha$  (Fig 4E). We further characterized this cell population in the lung tissues of *Mtb*-infected young alcohol diet-fed mice. As shown in S6 Fig, Ly6G+IFN- $\alpha$ + cells were positive for CD11b, CD200 and CD163 but negative for F4/80, CD68, CD115, CD11c, and Ly6C.

### IFN- $\alpha$ reduces the survival of *Mtb*-infected alcohol diet-fed young mice

Type 1 interferons have a protective role in viral infections [27]. However, in *Mtb* infection, type 1 interferon signaling causes immunopathology and early mortality in the infected mice [28]. We investigated whether the increased mortality of *Mtb*-infected alcohol-fed young mice was due to enhanced IFN- $\alpha$  production. Young mice were fed control and alcohol diets and infected with *Mtb* as in Fig 1. After three months, the mice were treated with either a neutralizing anti-IFNAR-1 mAb or an isotype-matched IgG1 control mAb. As shown in Fig 5A, 100% percent ( $p = 0.001$ ) of the *Mtb*-infected alcohol diet-fed young mice that received the isotype-matched control mAb died within 2 months. In contrast, all mice that received the anti-IFNAR-1 mAb survived. Histological analyses indicated that there were significantly fewer necrotic lesions throughout the lungs of the anti-IFNAR-1 mAb-treated *Mtb*-infected alcohol diet-fed young mice than in those of the isotype antibody-treated *Mtb*-infected alcohol diet-fed young mice (Fig 5B, 5C and 5D).

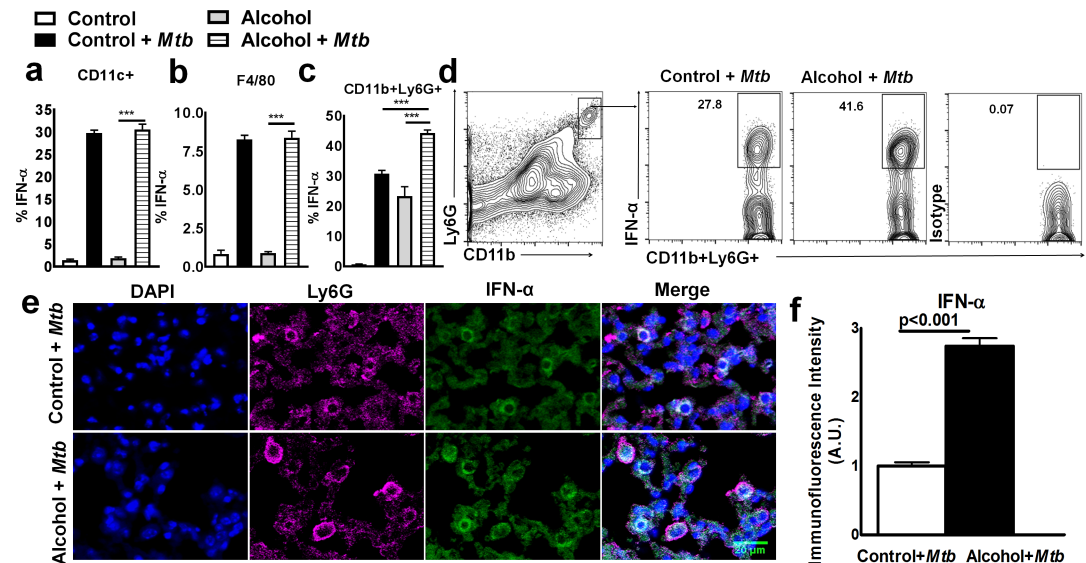

**Fig 4. CD11b+Ly6G+ cells are the major source of IFN- $\alpha$  in *Mtb*-infected young alcoholic mice.** Young control and alcohol diet-fed mice were infected with 50–100 CFU of aerosolized *Mtb*. At three months p.i., lungs from uninfected control and alcohol diet-fed mice and from *Mtb*-infected control and alcohol diet-fed mice were isolated. The percentages of a. IFN- $\alpha$ +CD11c+, b. IFN- $\alpha$ +F4/80+ and c. IFN- $\alpha$ +CD11b+Ly6G+ cells were determined by flow cytometry. The data are representative of two independent experiments. d. A representative flow cytometry figure is shown. e and f. At three months p. i., lungs from uninfected control and alcohol diet-fed mice as well as from *Mtb*-infected control and *Mtb*-infected alcohol diet-fed mice were isolated and formalin fixed. Paraffin-embedded tissue sections were prepared and examined for IFN- $\alpha$ + cells by confocal microscopy. e. A representative figure is shown. f. The immunofluorescence intensities (AU) of IFN- $\alpha$  were calculated for these groups and are shown. Five mice per group were used for each independent experiment. The mean values, p-values and SEs are shown.

<https://doi.org/10.1371/journal.ppat.1007174.g004>

### IFN- $\alpha$ production in *Mtb*-infected young alcoholic mice is associated with the expression of molecules involved in necroptosis

We further examined the lung lesions of *Mtb*-infected (three months after infection) alcohol diet-fed young mice using confocal microscopy. As shown in S3 Fig, cleaved caspase 3 expression was similar in *Mtb*-infected young alcoholic mice, *Mtb*-infected control and uninfected alcoholic mice, suggesting that there is no significant difference in lung cell apoptosis in these groups of mice. We next examined the expression of receptor-interacting serine/threonine-protein kinase (RIP)-1 and RIP-3, which are known to be expressed by cells undergoing programmed necrotic cell death (necroptosis) [29]. Six months after *Mtb* infection, lungs were isolated from control and alcohol diet-fed young and old mice, and the gene expression levels of RIP-1 and RIP-3 were determined by real-time PCR. As shown in Fig 6A, the expression levels of RIP-1 and RIP-3 in the lungs were significantly higher in *Mtb*-infected alcohol diet-fed young mice than in *Mtb*-infected alcohol diet-fed old mice and control diet-fed young mice. Confocal microscopy examinations of the lung sections also indicated significantly higher RIP-1 and RIP-3 expression in the lung lesions of *Mtb*-infected alcohol diet-fed young mice than in the lungs of *Mtb*-infected control and uninfected alcoholic mice (Fig 6B and S3B Fig). RIP-1 and RIP-3 are expressed by F4/80 macrophages but were not expressed by IFN- $\alpha$ -producing Ly6G+ cells (Fig 6C and 6D). To determine whether IFN- $\alpha$ -producing Ly6G+ cells are involved in the enhanced RIP-1 and RIP-3 expression in lung macrophages, we first used confocal microscopy to examine the lung sections of *Mtb*-infected young alcoholic mice for Ly6G+ and RIP-1 and RIP-3-expressing F4/80+ cell interactions. At three months p.i., the imaging results indicated that RIP-1 and RIP-3-expressing F4/80+ cells from *Mtb*-infected young

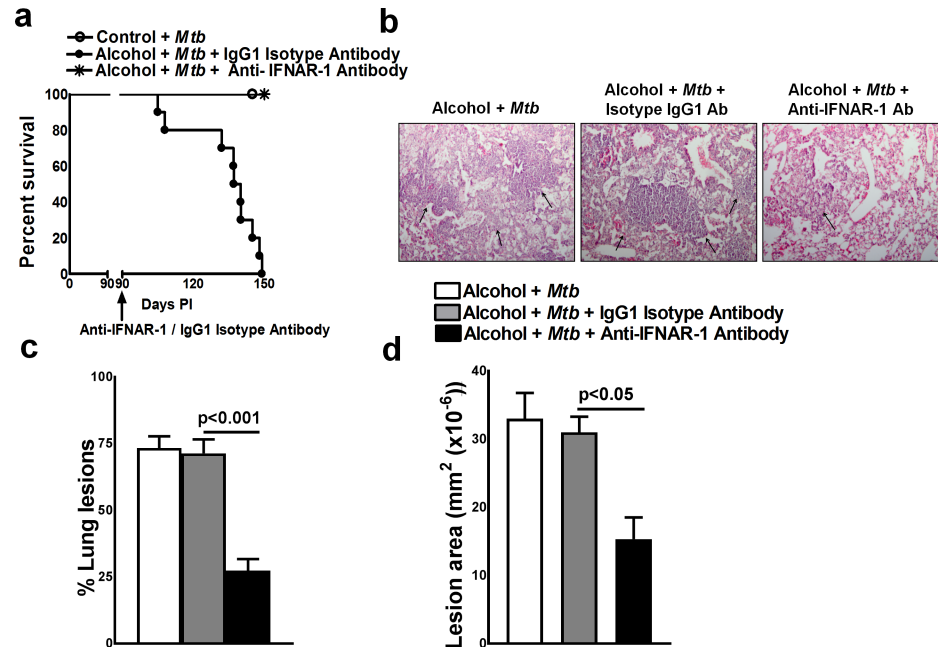

**Fig 5. IFN- $\alpha$  reduces the survival of *Mtb*-infected alcohol diet-fed young mice.** Control and alcohol diet-fed young mice were infected with 50–100 CFU of aerosolized *Mtb*. At three months p.i., some of the alcohol-fed *Mtb*-infected young mice were treated with either an anti-IFNAR-1 mAb or IgG1 isotype-matched control mAb (0.3 mg per mouse, starting 3 months p.i. every 4 days for 3 months). **a.** Survival rates of *Mtb*-infected alcohol-fed young mice treated with the anti-IFNAR-1 mAb or IgG1 isotype-matched control mAb. The data from two independent experiments were pooled. Five mice per group were used for each independent experiment. The survival curves were compared using the log-rank test ( $P < 0.001$ ). **b to d.** At three months p.i., *Mtb*-infected alcohol diet-fed mice were treated with either the anti-IFNAR-1 mAb or IgG1 isotype-matched control mAb. Lungs were isolated and formalin-fixed. Paraffin-embedded tissue sections were prepared, and hematoxylin and eosin staining was performed. **b.** A representative figure is shown. **c.** The % lung lesions and **d.** lesion area were calculated. The data from two independent experiments were pooled. Three mice per group were used for each independent experiment ( $n = 6$ ). The mean values, p-values and SEs are shown.

<https://doi.org/10.1371/journal.ppat.1007174.g005>

alcoholic mice were in closer proximity to IFN- $\alpha$ -producing Ly6G+ cells than those from *Mtb*-infected control mice (Fig 6D and S4 Fig). More importantly, our results indicate that the marked increase in IFN- $\alpha$  production was spatially defined at the region where both Ly6G+ and RIP-1 and RIP-3-expressing F4/80+ cells interact with each other (Fig 6D). RIP-1 and RIP-3 expression levels in the lungs were significantly lower in anti-IFNAR-1 mAb-treated *Mtb*-infected young alcoholic mice than in isotype antibody-treated *Mtb*-infected young alcoholic mice (Fig 6E).

### Alcohol does not enhance IFN- $\alpha$ production in old mice infected with *Mtb*

We compared IFN- $\alpha$  production in the lungs of alcohol-fed young and old mice following *Mtb* infection. Young and old mice were fed control and alcohol diets and infected with *Mtb* as in Fig 1. After three months, the mice were euthanized, and the lung sections were examined for IFN- $\alpha$  by confocal microscopy. As shown in S5 Fig, the immunofluorescence intensity for IFN- $\alpha$  was significantly lower in *Mtb*-infected old alcoholic mice than in *Mtb*-infected young alcoholic mice. We also found that RIP-1 and RIP-3 expression levels were significantly lower in the *Mtb*-infected old alcoholic mice than in the *Mtb*-infected young alcoholic mice (S5B, S5C and S5D Fig).

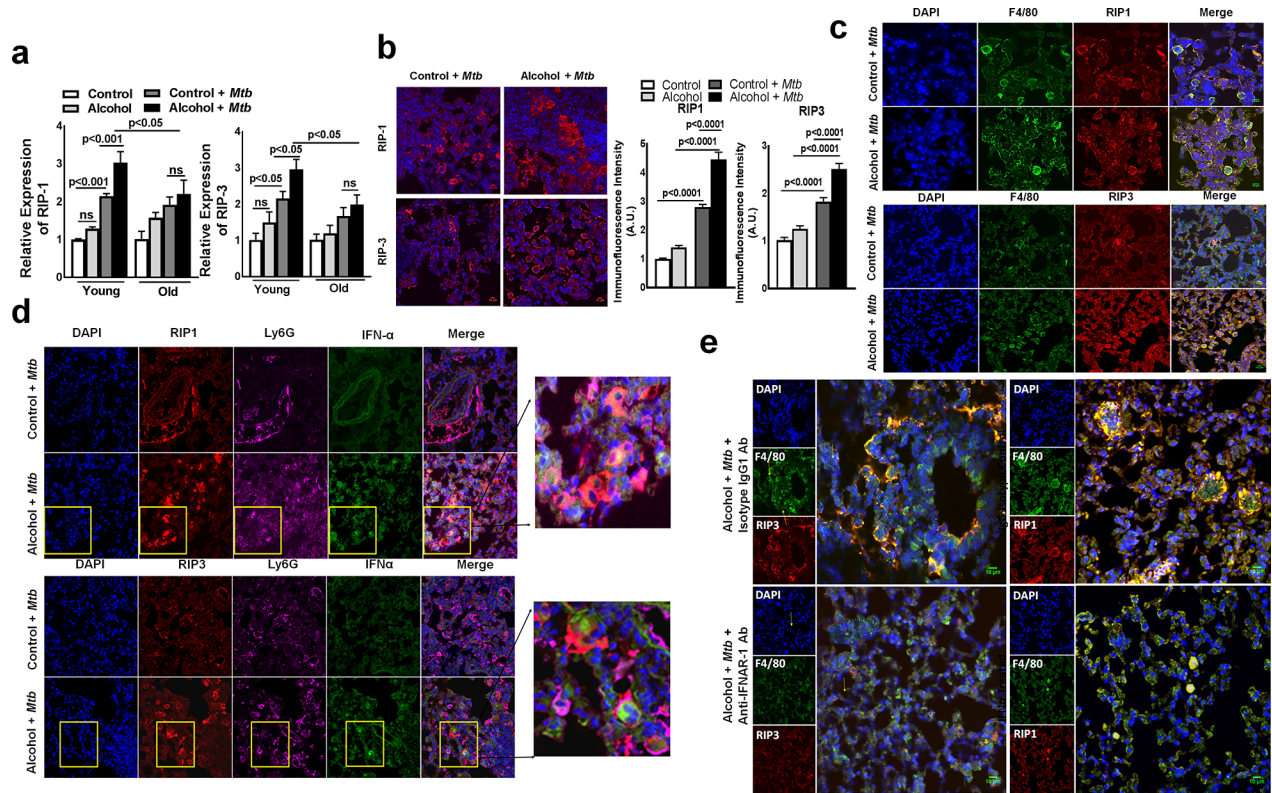

**Fig 6. IFN- $\alpha$  production in *Mtb*-infected young alcoholic mice is associated with the expression of molecules involved in necroptosis.** a. Young (one to two months of age) and old (17 to 22 months of age) mice were fed control and alcohol diets for one month as detailed in the methods section; then, they were infected with 50–100 CFU of aerosolized *Mtb* H37Rv, and control and alcohol diet feeding was continued. At six months p.i., lung homogenates from uninfected control and alcohol diet-fed mice and *Mtb*-infected control and alcohol diet-fed mice were collected, and RIP-1 and RIP-3 gene expression was determined by quantitative real-time PCR. Control and alcohol diet-fed young mice were infected with 50–100 CFU of aerosolized *Mtb*. At three months p.i., lungs from uninfected control and alcohol diet-fed mice as well as from *Mtb*-infected control and *Mtb*-infected alcohol diet-fed mice were isolated and formalin fixed. Paraffin-embedded tissue sections were prepared and analyzed by confocal microscopy for b. RIP-1+ and RIP-3+ cells (red). Representative images of staining patterns were taken of multiple fields at 40X and 63X with oil immersion. The immunofluorescence intensities for these groups were calculated. c. RIP-1- and RIP-3 (red)-expressing F4/80 macrophages (green). d. Lung paraffin-embedded tissue sections were analyzed by confocal microscopy to determine IFN- $\alpha$  (Green), Ly6G (Magenta or Far-red) and RIP1/3 (red) colocalization. Scale bar: 10  $\mu$ m. The rightmost panel shows a higher magnification for representation, and the yellow squares represent IFN- $\alpha$ -expressing Ly6G+ cells. e. Representative images of RIP-1 and RIP-3 expression in lung F4/80 macrophages from anti-IFNAR-1 antibody-treated and isotype control antibody (IgG1)-treated mice are shown. Five mice per group were used for each group. The mean values, p-values and SEs are shown.

<https://doi.org/10.1371/journal.ppat.1007174.g006>

### Alcoholism enhances IFN- $\alpha$ production by PBMCs from healthy young LTBI+ individuals

To determine the relevance of the above findings to the clinical manifestation of human *Mtb* infection, we obtained blood samples from alcoholic and non-alcoholic LTBI+ individuals. First, on the basis of age, we characterized the LTBI+ individuals by age group: <45 years (young) and >50 years (old). We cultured peripheral blood mononuclear cells (PBMCs) in the presence of 10  $\mu$ g/ml  $\gamma$ -irradiated *Mtb*. After 72 hours, IFN- $\alpha$  levels were determined by ELISA as detailed in the methods section. As shown in Fig 7,  $\gamma$ -irradiated *Mtb* significantly enhanced the IFN- $\alpha$  levels by 2-fold in PBMCs from young alcoholic LTBI+ individuals and compared with those from non-alcoholic young LTBI+ individuals and by 2.9-fold compared to those from old alcoholic LTBI+ individuals. The baseline IFN- $\alpha$  levels were also high in young alcoholic LTBI+ individuals compared with those of other groups (Fig 7).



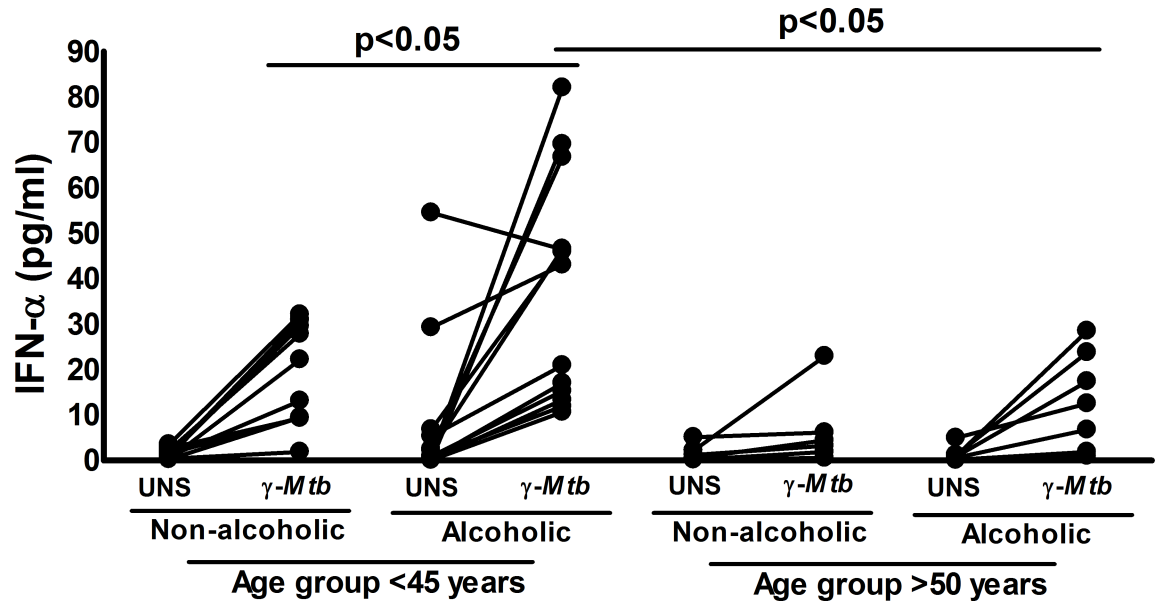

**Fig 7. Alcoholism enhances *Mtb*-induced IFN- $\alpha$  production by PBMCs from young LTBI+ individuals.** Blood samples were obtained from 17 non-alcoholic and 20 alcoholic pulmonary tuberculosis patients who were 18–75 years of age. On the basis of age, LTBI+ individuals were categorized in to young ( $n = 24$ , age <45) and old ( $n = 11$ , age >50 years) groups. PBMCs from alcoholic and non-alcoholic young and old LTBI+ individuals were cultured with or without  $\gamma$ -irradiated *Mtb* (10  $\mu$ g/ml). The levels of IFN- $\alpha$  were determined by ELISA. The mean values, p-values and SEs are shown.

<https://doi.org/10.1371/journal.ppat.1007174.g007>

## Discussion

Chronic alcohol consumption modulates host immune defense mechanism(s) and makes the host susceptible to various fungal, viral and bacterial infections, including *Mtb* [13,15,19]. However, limited information is available regarding the mechanisms involved in alcohol-mediated host susceptibility to *Mtb* and other intracellular bacterial infections. In the current study, we fed young and old mice control and alcohol diets and determined the mortality rates and the immune mechanisms involved in host susceptibility to *Mtb* infection. Approximately 80% of the *Mtb*-infected alcohol-fed young mice died within 5 months; however, only 25% of *Mtb*-infected alcohol-fed old mice and 25% of alcohol-fed uninfected young mice died during the same period. There were no significant differences in the bacterial lung burdens of control and alcohol diet-fed young mice and alcohol diet-fed old and young mice. IFN- $\alpha$  levels were significantly higher in the lungs of *Mtb*-infected alcohol-fed young mice, and treatment with an anti-IFNAR-1 antibody increased their survival. In the lungs of *Mtb*-infected alcohol-fed young mice, IFN- $\alpha$  enhanced the expression of RIP-1 and RIP-3, which are known to be involved in necroptosis. *Mtb*-infected alcohol-fed old mice and *Mtb*-infected control diet-fed old and young mice did not express IFN- $\alpha$ , RIP-1 or RIP-3 in their lungs. In response to *Mtb*, PBMCs from alcoholic LTBI+ healthy individuals produced significantly higher amounts of IFN- $\alpha$  than PBMCs from non-alcoholic young LTBI+ individuals and alcoholic and non-alcoholic aged LTBI+ individuals. Our findings demonstrate that alcohol enhances Ly6G+ cell infiltration and IFN- $\alpha$  production and increases necroptosis in the lung macrophages of young mice infected with *Mtb*, which leads to enhanced mortality.

Chronic alcohol consumption inhibits host protective immune responses to infections, including *Mtb* infection, and increases the mortality rates of young and aged individuals [30,31]. According to the Centers for Disease Control’s (CDC) estimations, one-third of binge drinkers are old individuals, and human studies have found that compared young individuals, old individuals are



more susceptible to various diseases [32–34]. Old individuals are likely to take prescribed medications, and in some cases, malnourishment and alcohol may have different effects on these individuals [34–36]. No experimental animal studies have been performed to determine the effects of chronic alcohol feeding in aging and *Mtb* infection. In the current study, we found that alcohol diet-fed young mice (1–2 months) are more susceptible to *Mtb* infection and have a higher mortality rate than alcohol diet-fed old mice (17–22 months) (Fig 1A). Our findings suggest that alcohol worsens the TB pathology in the early stage of life and leads to increased mortality.

We found that IFN- $\alpha$  is responsible for the early death of alcoholic *Mtb*-infected young mice. IFN- $\alpha$  is a type 1 interferon that belongs to the interferon family, which regulates the immune responses to infection, cancer and autoimmune diseases [37,38]. Type 1 interferons have a protective role during viral infections, but during *Mtb* infection, they enhance the pathogenicity [39,40]. *Mtb* proteins induce the production of type 1 interferons by host myeloid cells [41]. Type 1 interferons inhibit IL-1 $\beta$  production and enhance *Mtb* growth in myeloid cells [42]. In the current study, we found that IFN- $\alpha$  produced by Ly6G+ cells was associated with macrophage necroptosis and fatal immunopathology in the lungs of young alcohol diet-fed mice. IFNAR1 signaling is detrimental during *Mtb* infection and promotes excess inflammation [28]. Furthermore, in the current study, we found that *Mtb*-infected alcohol diet-fed mice survived for a longer period of time and had less bacterial burden in their lungs when type 1 IFN signaling pathways were blocked.

Old mice express transient early resistance to pulmonary tuberculosis, and type 1 cytokines have no influence on this early resistance [43]. It is known that several signaling pathways are defective in old mice [44]. The transient resistance in *Mtb*-infected old mice is due to a population of memory CD8+ T cells that express several receptors for Th1 cytokines; in addition, in aged mice, lung macrophages secrete more proinflammatory cytokines in response to *Mtb* [43]. We have not determined the CD8+ cell and macrophage responses in alcoholic old mice; however, our results demonstrate that alcohol-fed mice were unable to enhance IFN- $\alpha$  production in *Mtb*-infected old mice, and there were no effects on mortality compared to the non-alcoholic *Mtb*-infected old mice. IFN- $\alpha$  production in young alcoholic *Mtb*-infected mice significantly reduced their survival. Our current findings suggest that defective signaling pathways that are involved in the production of IFN- $\alpha$  in *Mtb*-infected old mice may be protecting them from alcohol-mediated lung cell necroptosis.

In various experimental models, it was shown that immune cells, such as macrophages, dendritic cells, T cells and Ly6G+ cells, produce type 1 interferons, and plasmacytoid dendritic cells are the major source [45]. However, only less than 1% of leucocytes are dendritic cells, and fifty percent of blood leucocytes are Ly6G+ cells [46]. Necrosis and Ly6G+ cell infiltration in the lung granuloma are characteristic features of tuberculosis granulomas, and these properties are associated with increased mycobacterial load and exacerbated lung pathology in human and experimental animals [47]. Netting Ly6G+ cells are the major inducers of type I IFN production [48]. Whole blood transcript signatures for active TB patients and pathway analyses revealed that the TB signature is dominated by a neutrophil-driven interferon (IFN)-inducible gene profile that consists of both IFN- $\gamma$  and type I IFN $\alpha\beta$  signaling [49]. Alcohol consumption can reduce the recruitment of Ly6G+ cells to the site of infection [19,50]. We have further investigated whether IFN- $\alpha$ -producing CD11b+ Ly6G+ cells are neutrophils. We found that these cells express a unique phenotype, including some neutrophils markers (positive for CD11b, CD200 and CD163 but negative for F4/80, CD68, CD115, CD11c, and Ly6C), suggesting these cells are not neutrophils. In the current study, we found fewer CD11b+Ly6G+ cells in the lungs of alcohol-fed *Mtb*-infected old mice than in those of alcohol-fed *Mtb*-infected young mice. We have not determined the factors underlying the reduced CD11b+Ly6G+ infiltration in the lungs of alcohol-fed *Mtb*-infected old mice, but it is known that in

old individuals, the neutrophil lifespan is decreased, neutrophil precursors in the bone marrow proliferate less, neutrophil recruitment at the site of inflammation is reduced, and CD11b+ Ly6G+ cells are less functional due to alterations in signaling pathways [51,52]. Our results suggest that alcohol consumption can enhance these defects in old mice and that Ly6G+ neutrophil-like cells are unable to migrate to the lungs of *Mtb*-infected mice, resulting in less IFN- $\alpha$  production and necroptosis and enhanced survival.

We found that IFN- $\alpha$  produced by Ly6G+ cells in alcohol-fed *Mtb*-infected young mice induces necroptosis in lung macrophages. Necroptosis is programmed necrosis that differs from other death pathways (apoptosis, autophagy and pyroptosis) due to the requirement of a unique signaling pathway associated with the activation of receptor-interacting protein (RIP) kinases 1 and 3 [53,54]. Caspase 1 expression was similar among all groups of infected mice, but RIP-1 and RIP-3 expression was significantly higher in the lungs of alcohol-fed *Mtb*-infected young mice than in those of control diet-fed *Mtb*-infected young mice and alcohol diet-fed *Mtb*-infected old mice. We also found that RIP-1 and RIP-3 expression was restricted to macrophages and that IFN- $\alpha$ -producing Ly6G+ cells were colocalized around macrophages. These findings suggest that IFN- $\alpha$ -producing Ly6G+ cells in alcohol-fed *Mtb*-infected young mice enhance necroptosis in lung macrophages.

Necroptosis exacerbates inflammatory responses to infection which contributes to tissue damage and pathology [55,56]. Our current findings demonstrate that alcohol enhances IFN- $\alpha$  mediated necroptotic death of lung macrophages in young *Mtb*-infected mice (Fig 6C). This leads to tissue damage and mortality in young alcoholic *Mtb*-infected mice.

To determine the clinical relevance of our mouse studies, we compared IFN- $\alpha$  levels in the culture supernatants of  $\gamma$ -irradiated *Mtb*-cultured PBMCs from young and old alcoholic and non-alcoholic healthy LTBI+ individuals. We found that PBMCs from young alcoholic LTBI+ individuals produced significantly higher amounts of IFN- $\alpha$  after culture with  $\gamma$ -irradiated *Mtb* than those from young non-alcoholic, old alcoholic and old non-alcoholic healthy LTBI+ individuals (Fig 7). Our findings suggest that young alcoholic LTBI+ individuals have a higher risk of developing active TB infection.

In conclusion, our studies demonstrate that alcohol increases the mortality of young but not old mice infected with *Mtb*. The increased mortality of alcohol-fed *Mtb*-infected young mice is due to IFN- $\alpha$  production by Ly6G+ cells. Further characterization of the exact phenotype of CD11b+ Ly6G+ cells and the delineation of the mechanisms through which alcohol enhances IFN- $\alpha$  production by Ly6G+ cells during *Mtb* infection will facilitate the development of therapies for alcoholic individuals with latent and active *Mtb*. Our findings may also be applicable to other intracellular pathogen infections.

## Materials and methods

### Animals

All animal studies were performed with specific pathogen-free, 6- to 8- week -old and 17- to 22-month-old male and female C57BL/6 mice (Jackson Laboratory and National Cancer Institute). The Institutional Animal Care and Use Committee of the University of Texas Health Science Center at Tyler approved the studies. The animal procedures involving the care and use of mice were conducted in accordance with the guidelines of the NIH/OLAW (Office of Laboratory Animal Welfare).

### Blood donors

Blood was obtained from 17 non-alcoholic and 20 alcoholic healthy LTBI+ individuals who were 18–75 years of age. PBMCs were isolated from freshly collected blood samples. All

subjects were HIV seronegative. The alcoholic LTBI+ individuals had a history of drinking at least 10–12 drinks per week.

### Ethics statement

All human studies were approved by the Institutional Review Board of the Bhagwan Mahavir Medical Research Centre, and informed written consent was obtained from all participants. All human subjects involved in our study were adults. All animal studies were approved by the Institutional Animal Care and Use Committee of the University of Texas Health Science Center at Tyler (Protocol #554). All animal procedures involving the care and use of mice were undertaken in accordance with the guidelines of the NIH/OLAW (Office of Laboratory Animal Welfare).

### Chronic alcohol diet

All mice were maintained on a standard rodent chow diet (LabDiet, catalog number 5053, St. Louis, MO, 4.07 kcal/gm) until the beginning of the experiment, when they were randomized into control or alcohol-containing liquid diet groups. The mice were fed alcohol using the Lieber-DeCarli liquid diet formulation (Dyets Inc., catalog number 710260; Bethlehem, Pa. 4.5 kcal/gm), which supplies 36% of the caloric intake as ethanol, or were fed an isocaloric liquid control diet (LCD) (Dyets Inc., catalog number 710027; Bethlehem, Pa. 4.5 kcal/gm) as previously described [57]. The animals were fed the respective liquid diets for 5 of 7 days and the chow diet for 2 of 7 days. Animals in the liquid ethanol diet (LED) group were given water containing 20% (wt/vol) ethanol on the two chow diet days. The weights of the mice were recorded weekly.

### Aerosol infection of mice with *Mtb* H37Rv

Mice were fed the alcohol and control diets, and after three months, they were infected with *Mtb* H37Rv using an aerosol exposure chamber as described previously [58]. Briefly, *Mtb* H37Rv was grown to the mid-log phase in liquid medium and then frozen in aliquots at  $-70^{\circ}\text{C}$ . Bacterial counts were determined by plating on 7H10 agar supplemented with oleic albumin dextrose catalase (OADC). For infection, the bacterial stocks were diluted in 10 ml of normal saline (to  $0.5 \times 10^6$  CFU [colony forming units]/ml,  $1 \times 10^6$  CFU/ml,  $2 \times 10^6$  CFU/ml, and  $4 \times 10^6$  CFU/ml) and placed in a nebulizer within an aerosol exposure chamber custom made by the University of Wisconsin. In the preliminary studies, groups of three mice were exposed to the aerosol at each concentration for 15 min. After 24 h, the mice were euthanized, and homogenized lung samples were plated on 7H10 agar plates supplemented with OADC. CFUs were counted after 14–22 days of incubation at  $37^{\circ}\text{C}$ . The aerosol concentration that resulted in ~50–100 bacteria in the lungs was used for the subsequent studies.

### Anti-IFNAR-1 treatment

For some experiments, mice were treated with anti-IFNAR-1 antibodies. One month after control and alcohol diet feeding, the mice were challenged with aerosolized *Mtb*. After 3 months, the mice received 0.3 mg of anti-IFNAR-1 (BioXcell, Clone: MAR1-5A3, Catalog number: BP0241) or isotype-matched control Ab (rat IgG1, Clone: MOPC-21, Catalog number: BE0083) intravenously every 4 days for up to 2 months.

## Lung cell preparation

Lungs were harvested from the alcohol and control diet-fed mice at the indicated time points after *Mtb* challenge and were placed into 60-mm dishes containing 2 ml of Hank's balanced salt solution (HBSS). The tissues were minced with scissors into pieces no larger than 2–3 mm, and the fluid was discharged onto a 70- $\mu$ m filter (BD Biosciences, San Jose, CA) that had been pre-wetted with 1 ml of PBS containing 0.5% bovine serum albumin (BSA, Sigma-Aldrich) suspended over a 50-ml conical tube. The syringe plunger was then used to gently disrupt the lung tissue before washing the filter with 2 ml of cold PBS/0.5% BSA. The total number of viable cells in the lungs was determined with the trypan blue exclusion method. For flow cytometry experiments, we gated based on the total lung CD45+ cells (leukocytes) and measured various cell populations.

## Abs and other reagents

For flow cytometry, we used FITC anti-CD3, PE anti-CD8, APC anti-CD4, APC anti-NK1.1, APC anti-CD11b, FITC anti-Ly6G, PE anti-IFN- $\alpha$ , APC CD11-C, and FITC anti-F4/80 antibodies (all from BioLegend). The antibodies used for the *in vivo* neutralization experiments were purchased from BioXcell (anti-mouse IFNAR-1, Clone: MAR1-5A3, Catalog number: BP0241, and mouse IgG1 isotype control, Clone: MOPC-21, Catalog number: BE0083). Anti-Ly6G (Sigma-Aldrich; MABF474), anti-F4/80 (Abcam; ab6640), anti-IFN- $\alpha$ -FITC conjugated (R&D Systems; 22100–3), anti-cleaved caspase-3 (Cell Signaling Technology; 9661S), anti-CD163 (Santa Cruz Biotechnology, INC; sc-58965), anti-Ly6C (Santa Cruz Biotechnology, INC; sc-52650), anti-CD115 (Santa Cruz Biotechnology, INC; sc-46662), anti-CD200 (Santa Cruz Biotechnology, INC; sc-53100), anti-CD11c (Abcam; ab33483), anti-CD68 (Abcam; ab53444), anti-RIP-1/3 (Santa Cruz Biotechnology, INC; sc-133102/sc-374639) and secondary antibodies (goat anti-rat IgG (H+L) -Alexa 647, goat anti-rabbit IgG (H+L), Alexa Fluor 488, and goat anti-mouse IgG (H+L), Alexa Fluor 594) were obtained from Life Technologies, and fluoroshield mounting medium with DAPI (Abcam, ab104139) was used for the confocal microscopy analyses.

## Flow cytometry

For surface staining,  $10^6$  cells were resuspended in 100  $\mu$ l of staining buffer (PBS containing 2% heat-inactivated FBS) and Abs. The cells were then incubated at 4° C for 30 min, washed twice and fixed in 1% paraformaldehyde before acquisition using a FACS Calibur flow cytometer (BD Biosciences). In some experiments, intracellular staining for IFN- $\alpha$  was performed. Controls for each experiment included cells that were unstained, cells to which PE-conjugated rat IgG had been added and cells that were single stained, either for a surface marker or for intracellular molecules. For IFN- $\alpha$  analysis, we gated based on CD11c, F4/80, CD11b or Ly6G-positive cells and determined the percentages or the number of IFN- $\alpha$  expressing cells.

## Measurement of cytokine production by multiplex ELISA

In the lung homogenates, the following 27 cytokines and chemokines were measured using a multiplex ELISA kit (M60009RDPD, Bio-Rad). The cytokines and chemokines analyzed were IL-1b, IL-1ra, IL-2, IL-4, IL-5, IL-6, IL-7, IL-8, IL-9, IL-10, IL-12 (p70), IL-13, IL-15, IL-17, basic FGF, eotaxin, G-CSF, GM-CSF, IFN- $\gamma$ , IP-10, MCP-1 (MCAF), MIP-1a, MIP-1b, PDGF-BB, RANTES, TNF- $\alpha$  and VEGF.

### Real-time PCR

RNA was isolated from lungs using TRIzol (Invitrogen) according to the manufacturer's instructions. Complementary DNA (cDNA) was generated from 0.5 mg of RNA and random hexamer primers using a Maxima First Strand cDNA Synthesis Kit for RT-qPCR (BIO-RAD) according to the manufacturer's instructions, and real-time PCR was performed. Gene expression for RIP-1 and RIP-3 was determined using Sybr green master mix (Qiagen), gene-specific primers (Sigma-Aldrich) and an ABI Prism 7600. All gene expression levels were normalized to  $\beta$ -actin internal controls, and the fold changes were calculated using the  $2^{-\Delta\Delta CT}$  method.

### Measurement of IFN- $\alpha$

IFN- $\alpha$  levels were measured using ELISA kits (Abcam, USA, catalog number: ab213479) according to the manufacturer's instructions.

### Measurement of serum alcohol levels

Serum was collected without anti-coagulant by cardiac puncture from control and alcohol diet-fed mice. Serum alcohol levels were determined by using an ethanol assay kit as per the manufacturer's guidelines (Abcam, USA, catalog number: ab65343).

### Histopathological assessment of necrotic lesions in the lung

At the specified time points, mice were euthanized, and the harvested lungs were placed in 10% neutral buffered formalin (Statlab, McKinney, TX, USA) for 48 hours to inactivate the infectious agent. Paraffin-embedded blocks were cut into 5  $\mu$ m-thick sections. For morphometric lesion analyses, the lung sections were stained with hematoxylin and eosin (H&E) and examined in a blinded manner to assess the necrotic lesions as previously described by Sibila et al. [59]. Briefly, each lung lobe was quantified for the lesion area and percentage of the lung lesions by using digital software (NIH ImageJ; developed at the U.S. National Institutes of Health and available on the Internet at <https://imagej.nih.gov/ij/>). Two investigators, DT and SC, independently assessed the immunohistochemical readouts using morphometric analyses.

### Confocal microscopy

Confocal microscopy was performed to colocalize IFN- $\alpha$ -producing Ly6G and RIP1/3-expressing F4/80 cells in the lung sections. The lung tissues were stored in 10% neutral buffered formalin; then, the samples were paraffin embedded and cut into 5  $\mu$ m thick sections that were deparaffinized and rehydrated. The tissue sections were subjected to heat-induced antigen retrieval in 10 mM sodium citrate buffer (pH 6.0). Then, the lung tissue sections were incubated in 0.025% Triton X-100 in PBST for 10 min and washed 3  $\times$  5 min using PBS. Non-specific binding was blocked with 5% goat serum in PBST for 1 hour, and the slides were washed 2  $\times$  5 min with PBS. The slides were then incubated at 4°C overnight in PBST with the appropriate dilutions of the following primary antibodies: anti-Ly6G (1:200), anti-F4/80 (1:50), anti-IFN- $\alpha$ -FITC-conjugated (1:50), anti-cleaved caspase-3 (1:400), anti-CD68 (1:100), anti-CD115 (1:50), anti-CD200 (1:50), anti-CD163 (1:50), anti-CD11c (1:100), anti-Ly6C (1:50) and anti-RIP-1/RIP-3 (1:50); subsequently, the slides were washed thoroughly 3  $\times$  5 min with PBS. Then, the tissue sections were stained with the respective secondary antibodies at 1:1000 dilutions (v/v), washed again with PBS for 3  $\times$  5 min, and mounted with fluoroshield mounting medium with DAPI. The slides were then examined and analyzed under a laser-scanning confocal microscope (Zeiss LSM 510 Meta). An IgG isotype secondary control was used for all the confocal microscopy studies, and Zen 2009 software (Carl Zeiss) was used for



image acquisition; then, the images were processed/quantified uniformly for each experiment using ImageJ NIH software. Representative images from three different independent experiments are shown.

### Statistical analysis

Data analyses were performed using GraphPad Prism (GraphPad Software, Inc., La Jolla, CA). The results are expressed as the mean  $\pm$  SE. For normally distributed data, comparisons between groups were performed using a paired or unpaired t-test and ANOVA as appropriate. Mouse survival was compared using the Kaplan-Meier log-rank test.

### Supporting information

**S1 Fig. Serum alcohol and liver enzyme levels of young and old alcoholic mice infected with *Mtb*.** Young (one to two months of age) and old (17 to 22 months of age) mice were fed control and alcohol diets as detailed in the methods section and were infected with 50–100 CFU of aerosolized *Mtb* H37Rv, and control and alcohol diet feeding was continued. **a.** At one month p.i., blood was obtained from uninfected control and alcohol diet-fed mice as well as from *Mtb*-infected control and *Mtb*-infected alcohol diet-fed mice; serum alcohol levels were measured, and **b.** liver enzyme alanine transaminase activity was determined. The data from two independent experiments were pooled. Three mice per group were used for each independent experiment ( $n = 6$ ). The mean values, p-values and SEs are shown.

(TIF)

**S2 Fig. Absolute number of lung leukocyte populations in *Mtb*-infected alcohol and control diet-fed mice. **a** and **b.**** Control and alcohol diet-fed mice were infected with 50–100 CFU of aerosolized *Mtb*. At three months p.i., the lungs from uninfected control and alcohol diet-fed mice and from *Mtb*-infected control and alcohol diet-fed mice were isolated. Representative flow cytometry figures showing various lymphocyte populations in the lungs of control, alcohol diet-fed, infected control and infected alcohol diet-fed mice are shown. This is a representative figure for Fig 3. The data are representative of two independent experiments. Five mice per group were used for each independent experiment.

(TIF)

**S3 Fig. Cleaved-caspase 3, RIP-1 and RIP-3 expression in the lungs of *Mtb*-infected young alcoholic mice.** Control and alcohol diet-fed young mice were infected with 50–100 CFU of aerosolized *Mtb*. At three months p.i., the lungs from uninfected control and alcohol diet-fed mice as well as from *Mtb*-infected control and *Mtb*-infected alcohol diet-fed mice were isolated and formalin fixed. Paraffin-embedded tissue sections were prepared and analyzed by confocal microscopy for **a.** cleaved-caspase 3 expression, and the immunofluorescence intensities for these groups were calculated. **b.** Representative images of RIP-1 and RIP-3 (red) staining for the mouse groups are shown. Representative staining pattern images for three independent experiments are shown. Five mice per group were used for each independent experiment. The mean values, p-values and SEs are shown.

(TIF)

**S4 Fig. IFN- $\alpha$ -producing Ly6G and RIP1/3-expressing F4/80 cells are in close proximity to each other in *Mtb*-infected alcohol diet-fed mice.** Control and alcohol diet-fed young mice were infected with 50–100 CFU of aerosolized *Mtb*. At three months p.i., lungs from uninfected control and alcohol diet-fed mice as well as from *Mtb*-infected control and *Mtb*-infected alcohol diet-fed mice were isolated and formalin fixed. Paraffin-embedded lung tissue sections were analyzed by confocal microscopy to determine IFN- $\alpha$  (Green), Ly6G (Magenta or Far-

red) and RIP1/3 (red) colocalization. The lowermost panel shows representative higher magnification images. Scale bar: 10  $\mu$ m. Representative staining pattern images of three independent experiments are shown. Five mice per group were used for each independent experiment. (TIF)

**S5 Fig. Alcohol does not enhance IFN- $\alpha$  production and RIP1/3 in old mice infected with *Mtb*.** Young (one to two months of age) and old (17 to 22 months of age) mice were fed the control and alcohol diets and were infected with 50–100 CFU of aerosolized *Mtb* H37Rv. At three months p.i., lungs from uninfected control and alcohol diet-fed mice as well as from *Mtb*-infected control and *Mtb*-infected alcohol diet-fed mice were isolated and formalin fixed. Lung paraffin-embedded tissue sections were analyzed by confocal microscopy and immunofluorescence intensity for **a.** IFN- $\alpha$  and **b.** RIP-1. **c.** The amount of RIP-3 molecules was calculated. **d.** Paraffin-embedded lung tissue sections from the old mice were analyzed by confocal microscopy to determine IFN- $\alpha$  (Green), Ly6G (Magenta or Far-red) and RIP1/3 (red) colocalization. Scale bar: 10  $\mu$ m. Representative staining pattern images of three independent experiments are shown. Five mice per group were used for each independent experiment. The mean values, p-values and SEs are shown. (TIF)

**S6 Fig. Characterization of IFN- $\alpha$  producing CD11b+Ly6G+ cells in young alcoholic mice infected with *Mtb*.** Young mice were fed the control and alcohol diets and infected with 50–100 CFU of aerosolized *Mtb* H37Rv as detailed in the methods section. At three months p.i., the lungs were isolated and formalin fixed. Lung paraffin-embedded tissue sections were analyzed by confocal microscopy, for CD11b, F4/80, CD68, CD115, CD200, CD163, CD11c, and Ly6C were determined. Representative staining pattern images of three independent experiments are shown. Five mice per group were used for each independent experiment. (TIF)

## Author Contributions

**Conceptualization:** Deepak Tripathi, Ramakrishna Vankayalapati.

**Data curation:** Deepak Tripathi, Elwyn Welch, Satyanarayana Swamy Cheekatla, Rajesh Kumar Radhakrishnan, Sambasivan Venkatasubramanian, Padmaja Paidipally, Abhinav Van, Buka Samten, Kamakshi P. Devalraju, Venkata Sanjeev Kumar Neela, Vijaya Lakshmi Valluri.

**Formal analysis:** Deepak Tripathi, Elwyn Welch, Satyanarayana Swamy Cheekatla, Rajesh Kumar Radhakrishnan, Sambasivan Venkatasubramanian, Padmaja Paidipally, Abhinav Van, Buka Samten, Kamakshi P. Devalraju, Venkata Sanjeev Kumar Neela, Vijaya Lakshmi Valluri, Ramakrishna Vankayalapati.

**Funding acquisition:** Ramakrishna Vankayalapati.

**Investigation:** Ramakrishna Vankayalapati.

**Methodology:** Ramakrishna Vankayalapati.

**Project administration:** Ramakrishna Vankayalapati.

**Supervision:** Ramakrishna Vankayalapati.

**Validation:** Ramakrishna Vankayalapati.

**Visualization:** Ramakrishna Vankayalapati.

**Writing – original draft:** Deepak Tripathi, Ramakrishna Vankayalapati.

**Writing – review & editing:** Satyanarayana Swamy Cheekatla, Buka Samten, Vijaya Lakshmi Valluri, Carol Mason, Steve Nelson, Ramakrishna Vankayalapati.

## References

1. Esmail H, Barry CE, Young DB, Wilkinson RJ. The ongoing challenge of latent tuberculosis. *Philos Trans R Soc B Biol Sci.* 2014; 369. <https://doi.org/10.1098/rstb.2013.0437> PMID: 24821923
2. Lin PL, Flynn JL. Understanding Latent Tuberculosis: A Moving Target. *J Immunol Baltim Md 1950.* 2010; 185: 15–22. <https://doi.org/10.4049/jimmunol.0903856> PMID: 20562268
3. Thomas TY, Rajagopalan S. Tuberculosis and Aging: A Global Health Problem. *Clin Infect Dis.* 2001; 33: 1034–1039. <https://doi.org/10.1086/322671> PMID: 11528577
4. Rajagopalan S. Tuberculosis in Older Adults. *Clin Geriatr Med.* 2016; 32: 479–491. <https://doi.org/10.1016/j.cger.2016.02.006> PMID: 27394018
5. Strong K, Mathers C, Leeder S, Beaglehole R. Preventing chronic diseases: how many lives can we save? *The Lancet.* 2005; 366: 1578–1582. [https://doi.org/10.1016/S0140-6736\(05\)67341-2](https://doi.org/10.1016/S0140-6736(05)67341-2)
6. Menzies D, Al Jahdali H, Al Otaibi B. Recent developments in treatment of latent tuberculosis infection. *Indian J Med Res.* 2011; 133: 257–266. PMID: 21441678
7. Restrepo BI, Schlesinger LS. Impact of diabetes on the natural history of tuberculosis. *Diabetes Res Clin Pract.* 2014; 106: 191–199. <https://doi.org/10.1016/j.diabres.2014.06.011> PMID: 25082309
8. Nuermberger E, Bishai WR, Grosset JH. Latent Tuberculosis Infection. *Semin Respir Crit Care Med.* 2004; 25: 317–336. <https://doi.org/10.1055/s-2004-829504> PMID: 16088473
9. Sulis G, Roggi A, Matteelli A, Raviglione MC. Tuberculosis: Epidemiology and Control. *Mediterr J Hematol Infect Dis.* 2014; 6. <https://doi.org/10.4084/MJHID.2014.070> PMID: 25408856
10. Weis SE, Slocum PC, Blais FX, King B, Nunn M, Matney GB, et al. The Effect of Directly Observed Therapy on the Rates of Drug Resistance and Relapse in Tuberculosis. *N Engl J Med.* 1994; 330: 1179–1184. <https://doi.org/10.1056/NEJM199404283301702> PMID: 8139628
11. Rehm J, Baliunas D, Borges GLG, Graham K, Irving H, Kehoe T, et al. The relation between different dimensions of alcohol consumption and burden of disease: an overview. *Addiction.* 2010; 105: 817–843. <https://doi.org/10.1111/j.1360-0443.2010.02899.x> PMID: 20331573
12. Gutjahr E, Gmel G, Rehm J. Relation between Average Alcohol Consumption and Disease: An Overview. *Eur Addict Res.* 2001; 7: 117–127. <https://doi.org/10.1159/000050729> PMID: 11509842
13. MacGregor RR. Alcohol and Immune Defense. *JAMA.* 1986; 256: 1474–1479. <https://doi.org/10.1001/jama.1986.03380110080031> PMID: 3747066
14. Lau AH, Szabo G, Thomson AW. Antigen-presenting cells under the influence of alcohol. *Trends Immunol.* 2009; 30: 13–22. <https://doi.org/10.1016/j.it.2008.09.005> PMID: 19059005
15. Szabo G, Mandrekar P. A Recent Perspective on Alcohol, Immunity, and Host Defense. *Alcohol Clin Exp Res.* 2009; 33: 220–232. <https://doi.org/10.1111/j.1530-0277.2008.00842.x> PMID: 19053973
16. Happel KI, Nelson S. Alcohol, Immunosuppression, and the Lung. *Proc Am Thorac Soc.* 2005; 2: 428–432. <https://doi.org/10.1513/pats.200507-065JS> PMID: 16322595
17. Dolganiuc A, Kodys K, Kopasz A, Marshall C, Mandrekar P, Szabo G. Additive Inhibition of Dendritic Cell Allostimulatory Capacity by Alcohol and Hepatitis C Is Not Restored by DC Maturation and Involves Abnormal IL-10 and IL-2 Induction. *Alcohol Clin Exp Res.* 2003; 27: 1023–1031. <https://doi.org/10.1097/01.ALC.0000071745.63433.32> PMID: 12824825
18. Szabo G, Catalano D, White B, Mandrekar P. Acute Alcohol Consumption Inhibits Accessory Cell Function of Monocytes and Dendritic Cells. *Alcohol Clin Exp Res.* 2004; 28: 824–828. <https://doi.org/10.1097/01.ALC.0000127104.80398.9B> PMID: 15166660
19. Szabo G. CONSEQUENCES OF ALCOHOL CONSUMPTION ON HOST DEFENCE. *Alcohol Alcohol.* 1999; 34: 830–841. <https://doi.org/10.1093/alcalc/34.6.830> PMID: 10659718
20. Pang M, Bala S, Kodys K, Catalano D, Szabo G. Inhibition of TLR8- and TLR4-induced Type I IFN induction by alcohol is different from its effects on inflammatory cytokine production in monocytes. *BMC Immunol.* 2011; 12: 55. <https://doi.org/10.1186/1471-2172-12-55> PMID: 21962237
21. Irwin M, Caldwell C, Smith TL, Brown S, Schuckit MA, Gillin JC. Major Depressive Disorder, Alcoholism, and Reduced Natural Killer Cell Cytotoxicity: Role of Severity of Depressive Symptoms and Alcohol Consumption. *Arch Gen Psychiatry.* 1990; 47: 713–719. <https://doi.org/10.1001/archpsyc.1990.01810200021003> PMID: 2378542

22. Molina PE, Happel KI, Zhang P, Kolls JK, Nelson S. Focus On: Alcohol and the Immune System. *Alcohol Res Health*. 2010; 33: 97–108. PMID: [23579940](https://pubmed.ncbi.nlm.nih.gov/23579940/)
23. Messingham KAN, Faunce DE, Kovacs EJ. Review article: Alcohol, injury, and cellular immunity. *Alcohol*. 2002; 28: 137–149. [https://doi.org/10.1016/S0741-8329\(02\)00278-1](https://doi.org/10.1016/S0741-8329(02)00278-1) PMID: [12551755](https://pubmed.ncbi.nlm.nih.gov/12551755/)
24. Lienhardt C. From exposure to disease: the role of environmental factors in susceptibility to and development of tuberculosis. *Epidemiol Rev*. 2001; 23: 288–301. PMID: [12192738](https://pubmed.ncbi.nlm.nih.gov/12192738/)
25. Rehm J, Samokhvalov AV, Neuman MG, Room R, Parry C, Lönnroth K, et al. The association between alcohol use, alcohol use disorders and tuberculosis (TB). A systematic review. *BMC Public Health*. 2009; 9: 450. <https://doi.org/10.1186/1471-2458-9-450> PMID: [19961618](https://pubmed.ncbi.nlm.nih.gov/19961618/)
26. Porretta E, Happel KI, Teng XS, Ramsay A, Mason CM. The Impact of Alcohol on BCG-Induced Immunity Against *Mycobacterium tuberculosis*. *Alcohol Clin Exp Res*. 2012; 36: 310–317. <https://doi.org/10.1111/j.1530-0277.2011.01624.x> PMID: [22014229](https://pubmed.ncbi.nlm.nih.gov/22014229/)
27. García-Sastre A, Biron CA. Type 1 Interferons and the Virus-Host Relationship: A Lesson in Détente. *Science*. 2006; 312: 879–882. <https://doi.org/10.1126/science.1125676> PMID: [16690858](https://pubmed.ncbi.nlm.nih.gov/16690858/)
28. Dorhoi A, Yeremeev V, Nouailles G, Weiner J, Jörg S, Heinemann E, et al. Type I IFN signaling triggers immunopathology in tuberculosis-susceptible mice by modulating lung phagocyte dynamics. *Eur J Immunol*. 2014; 44: 2380–2393. <https://doi.org/10.1002/eji.201344219> PMID: [24782112](https://pubmed.ncbi.nlm.nih.gov/24782112/)
29. Humphries F, Yang S, Wang B, Moynagh PN. RIP kinases: key decision makers in cell death and innate immunity. *Cell Death Differ*. 2015; 22: 225–236. <https://doi.org/10.1038/cdd.2014.126> PMID: [25146926](https://pubmed.ncbi.nlm.nih.gov/25146926/)
30. Volkmann T, Moonan PK, Miramontes R, Oeltmann JE. Excess Alcohol Use and Death among Tuberculosis Patients in the United States, 1997–2012. *J Tuberc Res*. 2016; 4: 18–22. <https://doi.org/10.4236/jtr.2016.41003> PMID: [27054144](https://pubmed.ncbi.nlm.nih.gov/27054144/)
31. Szabo G, Saha B. Alcohol's Effect on Host Defense. *Alcohol Res Curr Rev*. 2015; 37: 159–170.
32. Brayton RG, Stokes PE, Schwartz MS, Louria DB. Effect of Alcohol and Various Diseases on Leukocyte Mobilization, Phagocytosis and Intracellular Bacterial Killing. *N Engl J Med*. 1970; 282: 123–128. <https://doi.org/10.1056/NEJM197001152820303> PMID: [4982606](https://pubmed.ncbi.nlm.nih.gov/4982606/)
33. Anttila T, Helkala E-L, Viitanen M, Káreholt I, Fratiglioni L, Winblad B, et al. Alcohol drinking in middle age and subsequent risk of mild cognitive impairment and dementia in old age: a prospective population based study. *BMJ*. 2004; 329: 539. <https://doi.org/10.1136/bmj.38181.418958.BE> PMID: [15304383](https://pubmed.ncbi.nlm.nih.gov/15304383/)
34. Boule LA, Kovacs EJ. Alcohol, aging, and innate immunity. *J Leukoc Biol*. 2017; 102: 41–55. <https://doi.org/10.1189/jlb.4RU1016-450R> PMID: [28522597](https://pubmed.ncbi.nlm.nih.gov/28522597/)
35. Cousins G, Galvin R, Flood M, Kennedy M-C, Motterlini N, Henman MC, et al. Potential for alcohol and drug interactions in older adults: evidence from the Irish longitudinal study on ageing. *BMC Geriatr*. 2014; 14: 57. <https://doi.org/10.1186/1471-2318-14-57> PMID: [24766969](https://pubmed.ncbi.nlm.nih.gov/24766969/)
36. Pringle KE, Ahern FM, Heller DA, Gold CH, Brown TV. Potential for alcohol and prescription drug interactions in older people. *J Am Geriatr Soc*. 2005; 53: 1930–1936. <https://doi.org/10.1111/j.1532-5415.2005.00474.x> PMID: [16274374](https://pubmed.ncbi.nlm.nih.gov/16274374/)
37. González-Navajas JM, Lee J, David M, Raz E. Immunomodulatory functions of type I interferons. *Nat Rev Immunol*. 2012; 12: nri3133. <https://doi.org/10.1038/nri3133> PMID: [22222875](https://pubmed.ncbi.nlm.nih.gov/22222875/)
38. Theofilopoulos AN, Baccala R, Beutler B, Kono DH. TYPE I INTERFERONS ( $\alpha/\beta$ ) IN IMMUNITY AND AUTOIMMUNITY. *Annu Rev Immunol*. 2005; 23: 307–335. <https://doi.org/10.1146/annurev.immunol.23.021704.115843> PMID: [15771573](https://pubmed.ncbi.nlm.nih.gov/15771573/)
39. Stetson DB, Medzhitov R. Type I Interferons in Host Defense. *Immunity*. 2006; 25: 373–381. <https://doi.org/10.1016/j.immuni.2006.08.007> PMID: [16979569](https://pubmed.ncbi.nlm.nih.gov/16979569/)
40. Biron CA. Role of early cytokines, including alpha and beta interferons (IFN- $\alpha/\beta$ ), in innate and adaptive immune responses to viral infections. *Semin Immunol*. 1998; 10: 383–390. <https://doi.org/10.1006/smim.1998.0138> PMID: [9799713](https://pubmed.ncbi.nlm.nih.gov/9799713/)
41. Frucht DM, Fukao T, Bogdan C, Schindler H, O'Shea JJ, Koyasu S. IFN- $\gamma$  production by antigen-presenting cells: mechanisms emerge. *Trends Immunol*. 2001; 22: 556–560. [https://doi.org/10.1016/S1471-4906\(01\)02005-1](https://doi.org/10.1016/S1471-4906(01)02005-1) PMID: [11574279](https://pubmed.ncbi.nlm.nih.gov/11574279/)
42. Mayer-Barber KD, Andrade BB, Barber DL, Hieny S, Feng CG, Caspar P, et al. Innate and Adaptive Interferons Suppress IL-1 $\alpha$  and IL-1 $\beta$  Production by Distinct Pulmonary Myeloid Subsets during *Mycobacterium tuberculosis* Infection. *Immunity*. 2011; 35: 1023–1034. <https://doi.org/10.1016/j.immuni.2011.12.002> PMID: [22195750](https://pubmed.ncbi.nlm.nih.gov/22195750/)
43. Turner J, Frank AA, Orme IM. Old Mice Express a Transient Early Resistance to Pulmonary Tuberculosis That Is Mediated by CD8 T Cells. *Infect Immun*. 2002; 70: 4628–4637. <https://doi.org/10.1128/IAI.70.8.4628-4637.2002> PMID: [12117976](https://pubmed.ncbi.nlm.nih.gov/12117976/)

44. López-Otín C, Blasco MA, Partridge L, Serrano M, Kroemer G. The Hallmarks of Aging. *Cell*. 2013; 153: 1194–1217. <https://doi.org/10.1016/j.cell.2013.05.039> PMID: 23746838
45. Liu Y-J. IPC: Professional Type 1 Interferon-Producing Cells and Plasmacytoid Dendritic Cell Precursors. *Annu Rev Immunol*. 2005; 23: 275–306. <https://doi.org/10.1146/annurev.immunol.23.021704.115633> PMID: 15771572
46. Decker P. Neutrophils and interferon- $\alpha$ -producing cells: who produces interferon in lupus? *Arthritis Res Ther*. 2011; 13: 118. <https://doi.org/10.1186/ar3345> PMID: 21745418
47. Nandi B, Behar SM. Regulation of neutrophils by interferon- $\gamma$  limits lung inflammation during tuberculosis infection. *J Exp Med*. 2011; jem.20110919. <https://doi.org/10.1084/jem.20110919> PMID: 21967766
48. Netting Neutrophils Are Major Inducers of Type I IFN Production in Pediatric Systemic Lupus Erythematosus | Science Translational Medicine [Internet]. [cited 13 Nov 2017]. Available: <http://stm.sciencemag.org/content/3/73/73ra20.short>
49. Berry MPR, Graham CM, McNab FW, Xu Z, Bloch SAA, Oni T, et al. An interferon-inducible neutrophil-driven blood transcriptional signature in human tuberculosis. *Nature*. 2010; 466: nature09247. <https://doi.org/10.1038/nature09247> PMID: 20725040
50. Balamayooran G, Batra S, Fessler MB, Happel KI, Jeyaseelan S. Mechanisms of Neutrophil Accumulation in the Lungs Against Bacteria. *Am J Respir Cell Mol Biol*. 2010; 43: 5–16. <https://doi.org/10.1165/rcmb.2009-0047TR> PMID: 19738160
51. Lord JM, Butcher S, Killampali V, Lascelles D, Salmon M. Neutrophil ageing and immunosenescence. *Mech Ageing Dev*. 2001; 122: 1521–1535. [https://doi.org/10.1016/S0047-6374\(01\)00285-8](https://doi.org/10.1016/S0047-6374(01)00285-8) PMID: 11511394
52. Panda A, Arjona A, Sapey E, Bai F, Fikrig E, Montgomery RR, et al. Human innate immunosenescence: causes and consequences for immunity in old age. *Trends Immunol*. 2009; 30: 325–333. <https://doi.org/10.1016/j.it.2009.05.004> PMID: 19541535
53. Wu W, Liu P, Li J. Necroptosis: An emerging form of programmed cell death. *Crit Rev Oncol Hematol*. 2012; 82: 249–258. <https://doi.org/10.1016/j.critrevonc.2011.08.004> PMID: 21962882
54. Berghe TV, Linkermann A, Jouan-Lanhouet S, Walczak H, Vandennebeele P. Regulated necrosis: the expanding network of non-apoptotic cell death pathways. *Nat Rev Mol Cell Biol*. 2014; 15: nrm3737. <https://doi.org/10.1038/nrm3737> PMID: 24452471
55. Kearney CJ, Martin SJ. An Inflammatory Perspective on Necroptosis. *Mol Cell*. 2017; 65: 965–973. <https://doi.org/10.1016/j.molcel.2017.02.024> PMID: 28306512
56. Newton K, Manning G. Necroptosis and Inflammation. *Annu Rev Biochem*. 2016; 85: 743–763. <https://doi.org/10.1146/annurev-biochem-060815-014830> PMID: 26865533
57. Mason CM, Dobard E, Zhang P, Nelson S. Alcohol Exacerbates Murine Pulmonary Tuberculosis. *Infect Immun*. 2004; 72: 2556–2563. <https://doi.org/10.1128/IAI.72.5.2556-2563.2004> PMID: 15102763
58. Venkatasubramanian S, Dhiman R, Paidipally P, Cheekatla SS, Tripathi D, Welch E, et al. A rho GDP dissociation inhibitor produced by apoptotic T-cells inhibits growth of *Mycobacterium tuberculosis*. *PLoS Pathog*. 2015; 11: e1004617. <https://doi.org/10.1371/journal.ppat.1004617> PMID: 25659138
59. Sibila M, Aragón V, Fraile L, Segalés J. Comparison of four lung scoring systems for the assessment of the pathological outcomes derived from *Actinobacillus pleuropneumoniae* experimental infections. *BMC Vet Res*. 2014; 10: 165. <https://doi.org/10.1186/1746-6148-10-165> PMID: 25038822
